# Supplementary material
Source: Springer Nature journal article supplement (https://www.springermedizin.de/resource/supplementary/12889_2009_2034_MOESM4_ESM.pdf/9484386)
Supplement: MOESM4 [file 9484386]

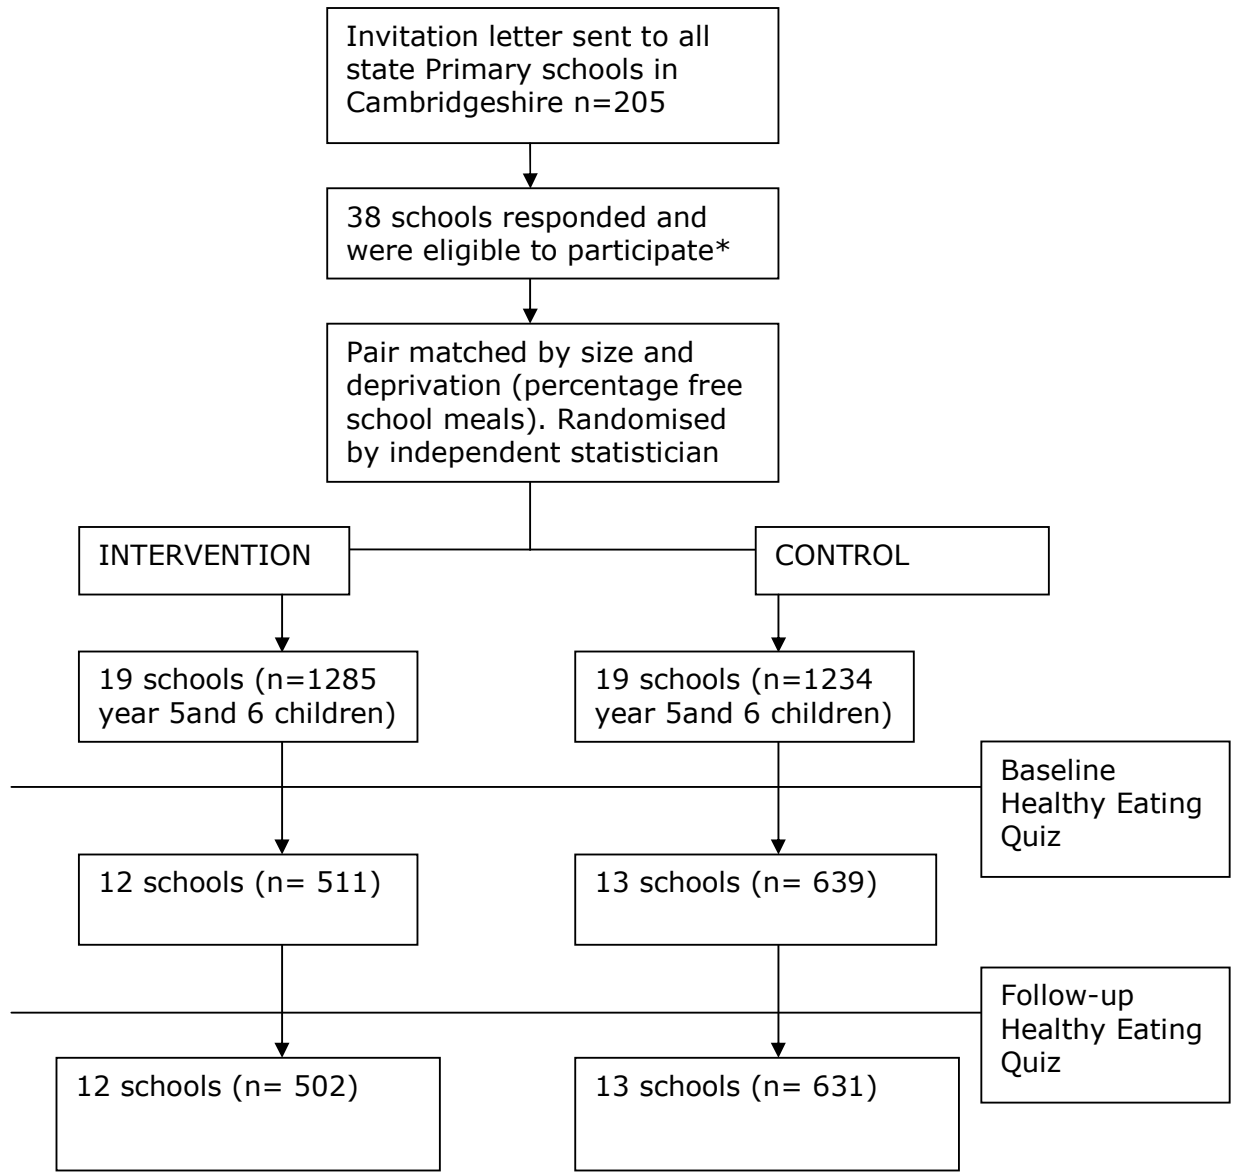

\* Schools were asked to respond only if they were planning to cover the theme of 'Healthy Eating' during the summer term and were also willing to take part in the trial.
